# Supplementary material for: Autozygome-guided exome sequencing in retinal dystrophy patients reveals pathogenetic mutations and novel candidate disease genes
Source: HighWire-hosted journal article supplement (doi:10.1101/gr.144105.112), 2012-10-26
Supplement: Table_S1.docx [file Table_S1.docx]

Table S1.

| ID | # Affected | Phenotype | # genes sequenced | Mutation revealed by direct sequencing | Comments | Reference |
| --- | --- | --- | --- | --- | --- | --- |
| sRP-003 | 1 | RP | 7 | [NM_002900.2 *RBP3* :c.1162C>T; p.(Arg388*)](https://mutalyzer.nl/checkForward?mutationName=NM_002900.2%28RBP3_v001%29%3Ac.1162C%3ET)  <http://grenada.lumc.nl/LOVD2/eye/variants.php?select_db=RBP3&action=view&view=0014452> | Novel | This study |
| sRP-010 | 1 | RP | 1 | NM_003322.3 *TULP1* :c.901C>T; p.(Gln301*) |  | [(Li et al. 2009)](file:///C:\Users\Alkuraya\Documents\Papers\RP%20Master%20Paper\GR\Revised\Leen\modified%20tables%20done.xlsx#RANGE!_ENREF_39) |
| sRP-013 | 1 | CD | 8 | [NM_152443.2 *RDH12*:c.178G>C; p.(Ala60Pro)](https://mutalyzer.nl/checkForward?mutationName=NM_152443.2%28RDH12_v001%29%3Ac.178G%3EC)  <http://grenada.lumc.nl/LOVD2/eye/variants.php?select_db=RDH12&action=view&view=0014453> | Novel, atypical phenotype for RDH12 | This study |
| sRP-019 | 1 | RP | 7 | NM_006269.1 *RP1*:c.3396G>A;p.(Trp1132*)  <http://grenada.lumc.nl/LOVD2/eye/variants.php?select_db=RP1&action=view&view=0014445> | Novel | This study |
| sRP-021 | 1 | RP | 1 | NM_003322.3 *TULP1* :c.901C>T; p.(Gln301*) |  | [(Li et al. 2009)](file:///C:\Users\Alkuraya\Documents\Papers\RP%20Master%20Paper\GR\Revised\Leen\modified%20tables%20done.xlsx#RANGE!_ENREF_39) |
| sRP-034 | 1 | RD NOS | 5 | NM_014249.2 *NR2E3* :c.C951del, p.(Thr318Argfs*6)  <http://grenada.lumc.nl/LOVD2/eye/variants.php?select_db=NR2E3&action=view&view=0014454> | Novel | This study |
| sRP-035 | 1 | LCA | 4 | [NM_000322.4 *PRPH2* :c.136C>T; p.(Arg46*)](https://mutalyzer.nl/checkForward?mutationName=NM_000322.4%28PRPH2_v001%29%3Ac.136C%3ET) | Atypical inheritance and phenotype for PRPH2 | [(Meins et al. 1993)](file:///C:\Users\Alkuraya\Documents\Papers\RP%20Master%20Paper\GR\Revised\Leen\modified%20tables%20done.xlsx#RANGE!_ENREF_43) |
| sRP-039 | 6 (1) | RP | 5 | [NM_000322.4 *PRPH2* :c.1013A>G; p.(Asp338Gly)](https://mutalyzer.nl/checkForward?mutationName=NM_000322.4%28PRPH2_v001%29%3Ac.1013A%3EG)  <http://grenada.lumc.nl/LOVD2/eye/variants.php?select_db=PRPH2&action=view&view=0014455> | Novel, atypical inheritance and phenotype for PRPH2 | This study |
| sRP-040 | 1 | RP | 3 | [NM_014249.2 *NR2E3* :c.C951del; p.(Thr318Argfs*6)](https://mutalyzer.nl/checkForward?mutationName=NM_014249.2%28NR2E3_v001%29%3Ac.951del)  <http://grenada.lumc.nl/LOVD2/eye/variants.php?select_db=NR2E3&action=view&view=0014454> | Novel | This study |
| sRP-047 | 1 | RP | 3 | NM_006269.1 *RP1*: c.606C>A, p.(Asp202Glu) |  | [(Aldahmesh et al. 2009)](file:///C:\Users\Alkuraya\Documents\Papers\RP%20Master%20Paper\GR\Revised\Leen\modified%20tables%20done.xlsx#RANGE!_ENREF_5) |
| sRP-051 | 1 | RP | 8 | NM_014249.2 *NR2E3*:c.C951del, p.(Thr318Argfs*6)  <http://grenada.lumc.nl/LOVD2/eye/variants.php?select_db=NR2E3&action=view&view=0014454> | Novel | This study |
| sRP-086 | 1 | RP | 4 | [NM_201253.2 *CRB1* :c.80G>T; p.(Cys27Phe)](https://mutalyzer.nl/checkForward?mutationName=NM_201253.2%28CRB1_v001%29%3Ac.80G%3ET) |  | [(Aldahmesh et al. 2009)](file:///C:\Users\Alkuraya\Documents\Papers\RP%20Master%20Paper\GR\Revised\Leen\modified%20tables%20done.xlsx#RANGE!_ENREF_5) |
| sRP-087 | 1 | RP | 6 | [NM_201253.2 *CRB1*:c.2234C>T; p.(Thr745Met)](https://mutalyzer.nl/checkForward?mutationName=NM_201253.2%28CRB1_v001%29%3Ac.2234C%3ET) |  | [(den Hollander et al. 1999)](file:///C:\Users\Alkuraya\Documents\Papers\RP%20Master%20Paper\GR\Revised\Leen\modified%20tables%20done.xlsx#RANGE!_ENREF_21) |
| DGU-F14 | 3 | RP | 3 | [NM_152443.2 *RDH12* :c.226G>C; p.(Gly76Arg)](https://mutalyzer.nl/checkForward?mutationName=NM_152443.2%28RDH12_v001%29%3Ac.226G%3EC) | Atypical inheritance for RDH12 in RP | [(Aldahmesh et al. 2009)](file:///C:\Users\Alkuraya\Documents\Papers\RP%20Master%20Paper\GR\Revised\Leen\modified%20tables%20done.xlsx#RANGE!_ENREF_5) |
| arRP-F002 | 8 | RP | 1 | [NM_003322.3 *TULP1* :c.901C>T; p.(Gln301*)](https://mutalyzer.nl/checkForward?mutationName=NM_003322.3%28TULP1_v001%29%3Ac.901C%3ET) |  | [(Li et al. 2009)](file:///C:\Users\Alkuraya\Documents\Papers\RP%20Master%20Paper\GR\Revised\Leen\modified%20tables%20done.xlsx#RANGE!_ENREF_39) |
| arRP-F003 | 2 | RP | 1 | [NM_003322.3 *TULP1* :c.901C>T; p.(Gln301*)](https://mutalyzer.nl/checkForward?mutationName=NM_003322.3%28TULP1_v001%29%3Ac.901C%3ET) |  | [(Li et al. 2009)](file:///C:\Users\Alkuraya\Documents\Papers\RP%20Master%20Paper\GR\Revised\Leen\modified%20tables%20done.xlsx#RANGE!_ENREF_39) |
| DGU-F1 | 3 | RP | 1 | NM_006269.1 *RP1*: c.662delC; p.(Ala221Glyfs*20) |  | [(Aldahmesh et al. 2009)](file:///C:\Users\Alkuraya\Documents\Papers\RP%20Master%20Paper\GR\Revised\Leen\modified%20tables%20done.xlsx#RANGE!_ENREF_5) |
| DGU-F11 | 4 | RP | 1 | NM_201253.2 *CRB1*, c.3495T>G, p.(Cys1165Trp)  <http://grenada.lumc.nl/LOVD2/eye/variants.php?select_db=CRB1&action=view&view=0014456> | Novel | [(Aldahmesh et al. 2009)](file:///C:\Users\Alkuraya\Documents\Papers\RP%20Master%20Paper\GR\Revised\Leen\modified%20tables%20done.xlsx#RANGE!_ENREF_5) |
| DGU-F16 | 3 | RP | 2 | [NM_006343.2 *MERTK* :c.1335_1336del; p.(Ala446Serfs*28)](https://mutalyzer.nl/checkForward?mutationName=NM_006343.2%28MERTK_v001%29%3Ac.1335_1336del) |  | [(Aldahmesh et al. 2009)](file:///C:\Users\Alkuraya\Documents\Papers\RP%20Master%20Paper\GR\Revised\Leen\modified%20tables%20done.xlsx#RANGE!_ENREF_5) |
| arRP-F013 | 3 | RP | 1 | [NM_003322.3 *TULP1* :c.901C>T; p.(Gln301*)](https://mutalyzer.nl/checkForward?mutationName=NM_003322.3%28TULP1_v001%29%3Ac.901C%3ET) |  | [(Li et al. 2009)](file:///C:\Users\Alkuraya\Documents\Papers\RP%20Master%20Paper\GR\Revised\Leen\modified%20tables%20done.xlsx#RANGE!_ENREF_39) |
| arRP-F015 | 2 | RP | 1 | NM_003322.3 *TULP1* :c.901C>T; p.(Gln301*) |  | [(Li et al. 2009)](file:///C:\Users\Alkuraya\Documents\Papers\RP%20Master%20Paper\GR\Revised\Leen\modified%20tables%20done.xlsx#RANGE!_ENREF_39) |
| arRP-F020 | 3 | RP | 1 | NM_003322.3 *TULP1* :c.901C>T; p.(Gln301*) |  | [(Li et al. 2009)](file:///C:\Users\Alkuraya\Documents\Papers\RP%20Master%20Paper\GR\Revised\Leen\modified%20tables%20done.xlsx#RANGE!_ENREF_39) |
| arRP-F025 | 3 | RP | 3 | [NM_145200.3 *CABP4* :c.81_82insA; p.(Pro28Thrfs*4)](https://mutalyzer.nl/checkForward?mutationName=NM_145200.3%28CABP4_v001%29%3Ac.81_82insA) |  | [(Aldahmesh et al. 2009)](file:///C:\Users\Alkuraya\Documents\Papers\RP%20Master%20Paper\GR\Revised\Leen\modified%20tables%20done.xlsx#RANGE!_ENREF_5) |
| arRP-F026 | 4 | RP | 2 | NM_033028.3 *BBS4* :c.157-2A>G, p.(Ala53Hisfs*2) | Family was originally recruited as non-syndromic RP but based on the BBS4 mutation was re-phenotyped and found to have features of BBS | [(Abu Safieh et al. 2010)](file:///C:\Users\Alkuraya\Documents\Papers\RP%20Master%20Paper\GR\Revised\Leen\modified%20tables%20done.xlsx#RANGE!_ENREF_2) |
| arPR-F027 | 5 | RP | 1 | NM_001142800.1 *EYS*_v001:c.32dup, p.(Met12Aspfs*14)  <http://grenada.lumc.nl/LOVD2/eye/variants.php?select_db=EYS&action=view&view=0014457> | Novel | This study |
| arPR-F028 | 4 | RP | 1 | NM_006269.1 *RP1*:c.4552A>T; p. (Lys1518*) |  | [(Al-Rashed et al. 2012)](file:///C:\Users\Alkuraya\Documents\Papers\RP%20Master%20Paper\GR\Revised\Leen\modified%20tables%20done.xlsx#RANGE!_ENREF_4) |
| arRP-F030 | 2 | RP | 1 | NM_201253.2 *CRB1* :c.3495T>G; p.(Cys1165Trp) |  | [(Aldahmesh et al. 2009)](file:///C:\Users\Alkuraya\Documents\Papers\RP%20Master%20Paper\GR\Revised\Leen\modified%20tables%20done.xlsx#RANGE!_ENREF_5) |
| arRP-F034 | 3 | CD | 3 | NM_033100.1 *PCDH21*:c.383C>G; p.(Ala128Gly)<http://grenada.lumc.nl/LOVD2/eye/variants.php?select_db=CDHR1&action=view&view=0014458> | Novel | This study |
| arRP-F035 | 1 | RP | 2 | [NM_152443.2 *RDH12* :c.139G>A; p.(Ala47Thr)](https://mutalyzer.nl/checkForward?mutationName=NM_152443.2%28RDH12_v001%29%3Ac.139G%3EA) | Atypical inheritance for RDH12 in RP | [(Thompson et al. 2005)](file:///C:\Users\Alkuraya\Documents\Papers\RP%20Master%20Paper\GR\Revised\Leen\modified%20tables%20done.xlsx#RANGE!_ENREF_51) |
| arRP-F038 | 2 | RP | 2 | [NM_001029883.2 *C2orf71* :c.1525del ; p.(Thr509Leufs*32)](https://mutalyzer.nl/checkForward?mutationName=NM_001029883.2%28C2orf71_v001%29%3Ac.1525del)  <http://grenada.lumc.nl/LOVD2/eye/variants.php?select_db=C2orf71&action=view&view=0014459> | Novel | This study |
| arRP-F043 | 4 | RP | 1 | NM_006269.1 *RP1*: c.3428 delA; p.(Asn1143Ilefs*25) |  | [(Al-Rashed et al. 2012)](file:///C:\Users\Alkuraya\Documents\Papers\RP%20Master%20Paper\GR\Revised\Leen\modified%20tables%20done.xlsx#RANGE!_ENREF_4) |
| arRP-F049 | 1 | RP | 1 | NM_001145291.1 *PDE6B*: c.810C>A, p.(Cys270*) |  | [(Danciger et al. 1996)](file:///C:\Users\Alkuraya\Documents\Papers\RP%20Master%20Paper\GR\Revised\Leen\modified%20tables%20done.xlsx#RANGE!_ENREF_18) |
| arRP-F052 | 2 | RP | 1 | NM_003322.3 *TULP1*: c.901C>T, p.(Gln301*) |  | [(Li et al. 2009)](file:///C:\Users\Alkuraya\Documents\Papers\RP%20Master%20Paper\GR\Revised\Leen\modified%20tables%20done.xlsx#RANGE!_ENREF_39) |
| arRP-F054 | 2 | RP | 2 | [NM_001145848.1 *PROM1*: c.1530C>G, p.(Tyr510*)](https://mutalyzer.nl/checkForward?mutationName=NM_001145848.1%28PROM1_v001%29%3Ac.1530C%3EG)  <http://grenada.lumc.nl/LOVD2/eye/variants.php?select_db=PROM1&action=view&view=0014460> | Novel | This study |
| arRP-F056 | 2 | LCA | 3 | [NM_020366.3 *RPGRIP1*:c.3565C>T; p.(Arg1189*)](https://mutalyzer.nl/checkForward?mutationName=NM_020366.3%28RPGRIP1_v001%29%3Ac.3565C%3ET)  <http://grenada.lumc.nl/LOVD2/eye/variants.php?select_db=RPGRIP1&action=view&view=0014461> | Novel | This study |
| arRP-F072 | 3 (2) | RP | 3 | [NM_000440.2 *PDE6A*:c.304C>A; p.(Arg102Ser)](https://mutalyzer.nl/checkForward?mutationName=NM_000440.2%28PDE6A_v001%29%3Ac.304C%3EA) |  | [(Dryja et al. 1999)](file:///C:\Users\Alkuraya\Documents\Papers\RP%20Master%20Paper\GR\Revised\Leen\modified%20tables%20done.xlsx#RANGE!_ENREF_24) |
| arRP-F073 | 9 (4) | CRD | 1 | NM_201253.2 *CRB1*: c.80G>T, p.(Cys27Phe) | Atypical phenotype and inheritance of CRB1 (heterozygous parents have RP phenotype) | [(Aldahmesh et al. 2009)](file:///C:\Users\Alkuraya\Documents\Papers\RP%20Master%20Paper\GR\Revised\Leen\modified%20tables%20done.xlsx#RANGE!_ENREF_5) |
| arRP-F083 | 2 | Retinitis punctata albescens | 2 | NM_020366.3 *RPGRIP1*: c.154C>T, p.(Arg52*)  <http://grenada.lumc.nl/LOVD2/eye/variants.php?select_db=RPGRIP1&action=view&view=0014462> | Novel | This study |
| arRP-F084 | 4 | RP | 1 | NM_006269.1 *RP1*: c.3428 delA; p.(Asn1143Ilefs*25) |  | [(Al-Rashed et al. 2012)](file:///C:\Users\Alkuraya\Documents\Papers\RP%20Master%20Paper\GR\Revised\Leen\modified%20tables%20done.xlsx#RANGE!_ENREF_4) |
| arRP-F093 | 3(2) | RETINAL DYSTROPHY |  | [NM_020366.3 *RPGRIP1*:c.3565C>T; p.(Arg1189*)](https://mutalyzer.nl/checkForward?mutationName=NM_020366.3%28RPGRIP1_v001%29%3Ac.3565C%3ET)  <http://grenada.lumc.nl/LOVD2/eye/variants.php?select_db=RPGRIP1&action=view&view=0014463> | Novel | This study |
| arRP-F094 | 1 | LCA | 3 | [NM_020366.3 *RPGRIP1* :c.3330T>A ; p.(Tyr1110*)](https://mutalyzer.nl/checkForward?mutationName=NM_020366.3%28RPGRIP1_v001%29%3Ac.3330T%3EA)  <http://grenada.lumc.nl/LOVD2/eye/variants.php?select_db=RPGRIP1&action=view&view=0014466> | Novel | This study |
| arRP-F101 | 4 | RP | 2 | NM_006269.1 *RP1*: c.3677_3678dupA; p.(Glu1227Metfs*29) |  | [(Al-Rashed et al. 2012)](file:///C:\Users\Alkuraya\Documents\Papers\RP%20Master%20Paper\GR\Revised\Leen\modified%20tables%20done.xlsx#RANGE!_ENREF_4) |
| arRP-F114 | 2 | RP | 1 | NM_006269.1 *RP1*: c.3428 delA; p.(Asn1143Ilefs*25) |  | [(Al-Rashed et al. 2012)](file:///C:\Users\Alkuraya\Documents\Papers\RP%20Master%20Paper\GR\Revised\Leen\modified%20tables%20done.xlsx#RANGE!_ENREF_4) |
| CR-F008 | 1 | non-syndromic CRD | 4 | [NM_017777.3 *MKS1* :c.184A>G; p.(Thr62Ala)](https://mutalyzer.nl/checkForward?mutationName=NM_017777.3%28MKS1_v001%29%3Ac.184A%3EG)  <http://databases.lovd.nl/shared/individuals/00000210> | Novel, first reported MKS1 mutation in non-syndromic RD | This study |
| KCNV2-F1 | 2 | cone dystrophy with supranormal rod response | 1 | [NM_133497.3 *KCNV2* :c.427G>T; p.(Glu143*)](https://mutalyzer.nl/checkForward?mutationName=NM_133497.3%28KCNV2_v001%29%3Ac.427G%3ET) |  | [(Wu et al. 2006)](file:///C:\Users\Alkuraya\Documents\Papers\RP%20Master%20Paper\GR\Revised\Leen\modified%20tables%20done.xlsx#RANGE!_ENREF_54) |
| KCNV2-F2 | 1 | cone dystrophy with supranormal rod response | 1 | [NM_133497.3 *KCNV2* :c.427G>T; p.(Glu143*)](https://mutalyzer.nl/checkForward?mutationName=NM_133497.3%28KCNV2_v001%29%3Ac.427G%3ET) |  | [(Wu et al. 2006)](file:///C:\Users\Alkuraya\Documents\Papers\RP%20Master%20Paper\GR\Revised\Leen\modified%20tables%20done.xlsx#RANGE!_ENREF_54) |
| KCNV2-F3 | 2 | cone dystrophy with supranormal rod response | 1 | NM_133497.1 *KCNV2*: c.159 C>G; p.(Tyr53*) |  | [(Khan et al. 2012)](file:///C:\Users\Alkuraya\Documents\Papers\RP%20Master%20Paper\GR\Revised\Leen\modified%20tables%20done.xlsx#RANGE!_ENREF_36) |
| KCNV2-F4 | 3 | cone dystrophy with supranormal rod response | 3 | [NM_133497.3 *KCNV2* :c.427G>T; p.(Glu143*)](https://mutalyzer.nl/checkForward?mutationName=NM_133497.3%28KCNV2_v001%29%3Ac.427G%3ET) |  | [(Wu et al. 2006)](file:///C:\Users\Alkuraya\Documents\Papers\RP%20Master%20Paper\GR\Revised\Leen\modified%20tables%20done.xlsx#RANGE!_ENREF_54) |
| KCNV2-F5 | 1 | cone dystrophy with supranormal rod response | 1 | NM_133497.1 *KCNV2*: c.240 G>T; p.(Glu80Asp) |  | [(Khan et al. 2012)](file:///C:\Users\Alkuraya\Documents\Papers\RP%20Master%20Paper\GR\Revised\Leen\modified%20tables%20done.xlsx#RANGE!_ENREF_36) |
| LCA-F001 | 2 | LCA | 8 | [NM_020366.3 *RPGRIP1*:c.2236G>A ; p.(Gly746Arg)](https://mutalyzer.nl/checkForward?mutationName=NM_020366.3%28RPGRIP1_v001%29%3Ac.2236G%3EA)  <http://grenada.lumc.nl/LOVD2/eye/variants.php?select_db=RPGRIP1&action=view&view=0014465> | Novel | This study |
| LCA-F023 | 2 | LCA | 2 | [NM_000329.2 *RPE65* :c.1459_1460del; p.(Leu487Glufs*25)](https://mutalyzer.nl/checkForward?mutationName=NM_000329.2%28RPE65_v001%29%3Ac.1459_1460del)  <http://grenada.lumc.nl/LOVD2/eye/variants.php?select_db=RPE65&action=view&view=0014475> | Novel | This study |
| LCA-F026 | 2 | LCA | 2 | [NM_014336.3 *AIPL1*:c.834G>A; p.(Trp278*)](https://mutalyzer.nl/checkForward?mutationName=NM_014336.3%28AIPL1_v001%29%3Ac.834G%3EA) |  | [(Sohocki et al. 2000)](file:///C:\Users\Alkuraya\Documents\Papers\RP%20Master%20Paper\GR\Revised\Leen\modified%20tables%20done.xlsx#RANGE!_ENREF_50) |
| LCA-F009 | 1 | LCA | 7 | [NM_020366.3 *RPGRIP1*:c.1107del; p.(Glu370Asnfs*5)](https://mutalyzer.nl/checkForward?mutationName=NM_020366.3%28RPGRIP1_v001%29%3Ac.1107del) |  | [(Dryja et al. 2001)](file:///C:\Users\Alkuraya\Documents\Papers\RP%20Master%20Paper\GR\Revised\Leen\modified%20tables%20done.xlsx#RANGE!_ENREF_22) |
| arRP-F006 | 3 | RP | 2 | NM_133497.3 *KCNV2*: c.427G>T, ):p.(Glu143*) |  | [(Wu et al. 2006)](file:///C:\Users\Alkuraya\Documents\Papers\RP%20Master%20Paper\GR\Revised\Leen\modified%20tables%20done.xlsx#RANGE!_ENREF_54) |
| LCA-F002 | 2 | LCA | 2 | NM_152443.2 *RDH12*: c.139G>A, p.(Ala47Thr) |  | [(Thompson et al. 2005)](file:///C:\Users\Alkuraya\Documents\Papers\RP%20Master%20Paper\GR\Revised\Leen\modified%20tables%20done.xlsx#RANGE!_ENREF_51) |
| sRP-014 | 1 | RP | 6 | NM_201253.2 *CRB1*: c.2024G>A, ):p.(Trp675*) |  | [(Li et al. 2009)](file:///C:\Users\Alkuraya\Documents\Papers\RP%20Master%20Paper\GR\Revised\Leen\modified%20tables%20done.xlsx#RANGE!_ENREF_39) |
| arRP-F098 | 1 | RP | 5 | NM_001142800.1 *EYS*: c.6050G>T, p.(Gly2017Val) |  | [(Barragan et al. 2010)](file:///C:\Users\Alkuraya\Documents\Papers\RP%20Master%20Paper\GR\Revised\Leen\modified%20tables%20done.xlsx#RANGE!_ENREF_11) |
| sRP-088 | 1 | RD NOS | 3 | NM_020366.3 *RPGRIP1*: c.3565C>T, p.(Arg1189*)  <http://grenada.lumc.nl/LOVD2/eye/variants.php?select_db=RPGRIP1&action=view&view=0014464> | Novel | This study |
