# Supplementary material for: Autozygome-guided exome sequencing in retinal dystrophy patients reveals pathogenetic mutations and novel candidate disease genes
Source: HighWire-hosted journal article supplement (doi:10.1101/gr.144105.112), 2012-10-26
Supplement: Table_S2.docx [file Table_S2.docx]

Table S2. Summary of the mutations identified on exome sequencing in known RD genes.

| ID | # Affected | Phenotype | # genes sequenced | Mutation revealed by exome | Comments | Reference |
| --- | --- | --- | --- | --- | --- | --- |
| sRP-002 | 1 | Achromatopsia | 5 | [NM_001298.2 *CNGA3*:c.488C>T; p.(Pro163Leu)](https://mutalyzer.nl/checkForward?mutationName=NM_001298.2%28CNGA3_v001%29%3Ac.488C%3ET) |  | Kohl (1998) |
| sRP-005 | 1 | RP | 9 | NM_001297.1 *CNGB1*:c.2957A>T; p.(Lys986Met) |  | Simpson (2011) |
| sRP-007 | 1 | RP | 7 | NM_001142800.1 *EYS*:c.6050G>T; p.(Gly2017Val) |  | [(Barragan et al. 2010)](file:///C:\Users\Alkuraya\Documents\Papers\RP%20Master%20Paper\GR\Revised\Leen\modified%20tables%20done.xlsx#RANGE!_ENREF_11) |
| sRP-015 | 1 | RP | 4 | NM_000326.4 *RLBP1*:c.452G>A; p.(Arg151Gln) |  | [(Maw et al. 1997)](file:///C:\Users\Alkuraya\Documents\Papers\RP%20Master%20Paper\GR\Revised\Leen\modified%20tables%20done.xlsx#RANGE!_ENREF_42) |
| sRP-018 | 1 | RP | 3 | NM_000350.2 *ABCA4* :c.4316G>A; p.(Gly1439Asp)  <http://grenada.lumc.nl/LOVD2/eye/variants.php?select_db=ABCA4&action=view&view=0014448> | Novel | This study |
| sRP-045 | 1 | RP | N/A | NM_201548.4 *CERKL*:c.734T>C; p. (Leu245Pro)  <http://grenada.lumc.nl/LOVD2/eye/variants.php?select_db=CERKL&action=view&view=0014449> | Novel | This study |
| sRP-084 | 1 | RP | N/A | NM_006269.1 *RP1*: c.1012C>T, p.(Arg338*)  <http://grenada.lumc.nl/LOVD2/eye/variants.php?select_db=RP1&action=view&view=0014450> | Novel | This study |
| arRP-FD02 | 5 | RP/ BBS | 3 | NM_006269.1 *RP1* :c.5008G>A; p.(Ala1670Thr)  <http://grenada.lumc.nl/LOVD2/eye/variants.php?select_db=RP1&action=view&view=0014446> | See Figure S1 for details | [(Abu Safieh et al. 2010)](file:///C:\Users\Alkuraya\Documents\Papers\RP%20Master%20Paper\GR\Revised\Leen\modified%20tables%20done.xlsx#RANGE!_ENREF_2) |
| NM_024649.1 *BBS1*: c.951+58C>T; p.(G318VfsX61) |
| arRP-F062 | 3 | RP | N/A | NM_201253.2 *CRB1*:c.1429G>A; p.(Gly477Arg)  <http://grenada.lumc.nl/LOVD2/eye/variants.php?select_db=CRB1&action=view&view=0014451> | Novel | This study |
| arRP-F069 | 4 | RP | 2 | NM_000326.1 *RLBP1*:c.446C>T; p.(Ser149Phe) |  | [(Naz et al. 2011)](file:///C:\Users\Alkuraya\Documents\Papers\RP%20Master%20Paper\GR\Revised\Leen\modified%20tables%20done.xlsx#RANGE!_ENREF_46) |
| arRP-F071 | 12 (4) | RP | N/A | NM_016247 *IMPG2*: c.2346_2347del, p.(Arg782Serfs*24)  <http://grenada.lumc.nl/LOVD2/eye/variants.php?select_db=IMPG2&action=view&view=0014467> | Novel | This study |
| arRP-F075 | 4 | RP | N/A | NM_000329.2 *RPE65*:c.310G>C; p.(Gly104Arg)  <http://grenada.lumc.nl/LOVD2/eye/variants.php?select_db=RPE65&action=view&view=0014468> | Novel | This study |
| arRP-F106 | 3 | RP | N/A | NM_003322.3 *TULP1* :c.901C>T; p.(Gln301*) |  | [(Li et al. 2009)](file:///C:\Users\Alkuraya\Documents\Papers\RP%20Master%20Paper\GR\Revised\Leen\modified%20tables%20done.xlsx#RANGE!_ENREF_39) |
| arRP-F111 | 2 | RP | N/A | [NM_006269.1 *RP1* :c.4242_4243del, p.(His1414Glnfs*5)](https://mutalyzer.nl/checkForward?mutationName=NM_006269.1%28RP1_v001%29%3Ac.4242_4243del)  <http://grenada.lumc.nl/LOVD2/eye/variants.php?select_db=RP1&action=view&view=0014447> | Novel | This study |
| arRP-F116 | 3 | RP | N/A | [NM_006269.1 *RP1* :c.4242_4243del, p.(His1414Glnfs*5)](https://mutalyzer.nl/checkForward?mutationName=NM_006269.1%28RP1_v001%29%3Ac.4242_4243del)  <http://grenada.lumc.nl/LOVD2/eye/variants.php?select_db=RP1&action=view&view=0014469> | Novel | This study |
| arRP-F119 | 1 | RP | N/A | [NM_000350.2 *ABCA4* :c.4316G>A; P.(Gly1439Asp)](https://mutalyzer.nl/checkForward?mutationName=NM_000350.2%28ABCA4_v001%29%3Ac.4316G%3EA) |  | [(Lewis et al. 1999)](file:///C:\Users\Alkuraya\Documents\Papers\RP%20Master%20Paper\GR\Revised\Leen\modified%20tables%20done.xlsx#RANGE!_ENREF_38) |
| arRP-F129 | 5 (3) | RD NOS | N/A | [NM_133497.3 *KCNV2* :c.427G>T; p.Glu143*)](https://mutalyzer.nl/checkForward?mutationName=NM_133497.3%28KCNV2_v001%29%3Ac.427G%3ET) |  | [(Wu et al. 2006)](file:///C:\Users\Alkuraya\Documents\Papers\RP%20Master%20Paper\GR\Revised\Leen\modified%20tables%20done.xlsx#RANGE!_ENREF_54) |
| arRP-F121 | 3 | RP | N/A | NM_003322.3 *TULP1* :c.901C>T; p.Gln301* |  | [(Li et al. 2009)](file:///C:\Users\Alkuraya\Documents\Papers\RP%20Master%20Paper\GR\Revised\Leen\modified%20tables%20done.xlsx#RANGE!_ENREF_39) |
| CR-F010 | 3 | CRD | 1 | [NM_145200.3 *CABP4*:c.81_82insA; p.(Arg54Alafs*19)](https://mutalyzer.nl/checkForward?mutationName=NM_145200.3%3An.158_159insA) |  | [(Aldahmesh et al. 2009)](file:///C:\Users\Alkuraya\Documents\Papers\RP%20Master%20Paper\GR\Revised\Leen\modified%20tables%20done.xlsx#RANGE!_ENREF_5) |
| CR-F021 | 7 (3) | Atypical achromatopsia with severe rod involvement | N/A | [NM_001298.2 *CNGA3* :c.661C>T; p.( Arg221*)](https://mutalyzer.nl/checkForward?mutationName=NM_001298.2%28CNGA3_v001%29%3Ac.661C%3ET) |  | [(Johnson et al. 2004)](file:///C:\Users\Alkuraya\Documents\Papers\RP%20Master%20Paper\GR\Revised\Leen\modified%20tables%20done.xlsx#RANGE!_ENREF_34) |
| CR-F028 | 2 | CRD | N/A | NM_020366 *RPGRIP1*:c.1107delA: p.(Glu370Asnfs*5)  <http://grenada.lumc.nl/LOVD2/eye/variants.php?select_db=RPGRIP1&action=view&view=0014470> | Novel | This study |
| LCA-F005 | 3 | LCA | N/A | NM_000329.2 *RPE65* :c.271C>T; p.(Arg91Trp) |  | [(Morimura et al. 1998)](file:///C:\Users\Alkuraya\Documents\Papers\RP%20Master%20Paper\GR\Revised\Leen\modified%20tables%20done.xlsx#RANGE!_ENREF_44) |
| LCA-F014 | 7 (4) | LCA | N/A | NM_000329.2 *RPE65* :c.271C>T; p.(Arg91Trp) |  | [(Morimura et al. 1998)](file:///C:\Users\Alkuraya\Documents\Papers\RP%20Master%20Paper\GR\Revised\Leen\modified%20tables%20done.xlsx#RANGE!_ENREF_44) |
| LCA-F032 | 2 | LCA with gliosis | N/A | NM_020366.3 *RPGRIP1* :c.2236G>A; p.(Gly746Arg)  <http://grenada.lumc.nl/LOVD2/eye/variants.php?select_db=RPGRIP1&action=view&view=0014471> | Novel | This study |
| LCA-F041 | 3 (1) | LCA | N/A | NM_020366 *RPGRIP1*:c.1107delA: p.(Glu370Asnfs*5)  <http://grenada.lumc.nl/LOVD2/eye/variants.php?select_db=RPGRIP1&action=view&view=0014472> | Novel | This study |
| arRP-F008 | 2 | CRD | 5 | NM_020184.3 *CNNM4*: c.1484C>T; p.(Thr495Ile)  <http://grenada.lumc.nl/LOVD2/eye/variants.php?select_db=CNNM4&action=view&view=0014474> | Novel. Patients were found to have amelogenesis imperfecta after the mutation was identified i.e. consistent with Jalili syndrome | This study |
| RC-F001 | 3 | RP | 3 | NM_001122769.2 *LCA5*: c.256del; p.(Gln86Argfs*25)  <http://grenada.lumc.nl/LOVD2/eye/variants.php?select_db=LCA5&action=view&view=0014473> | Novel | This study |
| arRP-F007 | 2 | RP | 6 | NM_000350.2 *ABCA4*: c.4793C>A; p.(Ala1598Asp) |  | [(Maugeri et al. 2000)](file:///C:\Users\Alkuraya\Documents\Papers\RP%20Master%20Paper\GR\Revised\Leen\modified%20tables%20done.xlsx#RANGE!_ENREF_41) |
