# Supplementary material for: Autozygome-guided exome sequencing in retinal dystrophy patients reveals pathogenetic mutations and novel candidate disease genes
Source: HighWire-hosted journal article supplement (doi:10.1101/gr.144105.112), 2012-10-26
Supplement: Table_S3.docx [file Table_S3.docx]

Table S3. Summary of the filtration strategy used in patients in whom exome sequencing failed to identify a pathogenic mutation in any of the known RD genes.

| **Family ID** | **# affected** | **Phenotype** | **# genes sequenced** | **ROH** | **Filtration Strategy** | | | | | | **mutation** | **Prediction** | **Remarks** |
| --- | --- | --- | --- | --- | --- | --- | --- | --- | --- | --- | --- | --- | --- |
| **total exome variants** | **Homozygous** | **Absent in dbSNP** | **Coding /splicing (exclusion of synonymous)** | **Within the autozygome** | **Absent in EVS & other Saudi exomes** |
| sRP-001 | 2 (1) | non-syndromic RP | 5 | Chr1: 1-109,850,000 | 80432 | 39037 | 1938 | 131 | 13 | 5 | ***TNFRSF1B:***NM_001066: c.C680T: p.Thr227Met | Benign |  |
| ***EMC1***:NM_015047: c.G430A: p.Ala144Thr | Pathogenic | Absent in Saudi controls |
|
|
| Chr3: 1-52,900,000 | ***DOCK7***:NM_033407: c.A4291G: p.Arg1431Gly | Benign |  |
|
|
| Chr17: 12,900,000-68,600,000 | ***LGALS9B:*** NM_001042685:c.6_7insTGGC:p.Ala2fs68* |  | Absent in Saudi controls |
| Chr6: 2,500,000-87,000,000 | ***KRTAP4-11***:NM_033059: c.A67T: p.Thr23Ser | Benign |  |
|
| sRP-022 | 2 (1) | non-syndromic RP | 3 | Chr2:79,000,000-152,000,000 | 83826 | 34145 | 1569 | 107 | 14 | 3 | ***MFSD9***:NM_032718: c.G61A:p.Glu21Lys, | Benign |  |
| Chr3: 69,000,000-100,000,000 | ***PDZRN3***:NM_015009: c.T2705C:p.Leu902Pro, | Pathogenic | Found in Saudi controls |
| Chr4: 5,000,000-25,000,000 | ***GPR125***:NM_145290:exon17:c.C2504G:p.Ser835Cys | Pathogenic | Absent in Saudi controls |
| sRP-004 | 2 (1) | non-syndromic RP | 2 | Chr7: 134,000,000-139,000,000 | 97343 | 34247 | 1621 | 114 | 1 | 1 | ***KIAAI54:*** NM_001164665:c.2399_2400insAA: p.Thr800fs809* |  | Absent in Saudi controls |
| Chr10: 15,000,000-17,500,000 |
| Chr15: 41,000,000-43,000,000 |
| sRP-017 | 2 (1) | non-syndromic RP | 4 | Chr5: 48,000,000-67,000,000 | 84681 | 33646 | 1549 | 92 | 5 | 1 | ***DHX29:*** NM_019030: c.C2738T: p.Ala913Val | Benign |  |
| Chr2: 63,000,000-75,000,000 |
| Chr6: 148,500,000-160,000,000 |
| Chr17: 54,500,000-63,000,000 |
| arRP-F017 | 3 | non-syndromic RP | 7 | Chr6:0-90,000,000 | 82170 | 35716 | 1647 | 117 | 5 | 4 | ***HIVEP1***:NM_002114: c.C5155G: p.Leu1719Val | Benign |  |
|
|
| Chr11:27,012,359-80,054,831 | ***EXT2***:NM_001178083: c.C770G: p.Ser257Cys | Pathogenic | Failed segregation test |
|
|
| ***OR4C16***NM_001004701: c.A106T: p.Thr36Ser | Pathogenic | olfactory receptor family of proteins are not uncommonly truncated in healthy people |
|
|
| ***DPP3:*** NM_005700: c.C25T:p.Pro9Ser | Pathogenic | Found in Saudi controls |
|
|
| Chr14:84,500,000-93,268,050 | ***UBR7:*** NM_001100417: c.G238A: p.Val80Ile | Benign |  |
|
|
| arRP-F112 | 6 (3) | RP, alopecia, hearing loss | NA | chr1:94,270,165-97,918,306 | 90010 | 35378 | 1536 | 109 | 4 | 2 | ***KCNN3***: NM_002249: c.239_241del:p.80_81del |  | No eye phenotype in KO mouse |
| NA | chr4:3,579,139-4,907,387 | ***HTT***: NM_002111:c.52_60del: p.18_20del |  | Mutated in Huntington disease |
| CR-F024 | 1 | Cone-rod dystrophy | NA |  | 86076 | 36547 | 1748 | 129 | 1 | 1 | ***C21orf2***:NM_004928.2: c.103delA: p.Ile35f |  | Absent in Saudi controls |
| CRSPW | 3 | CRD, spastic paraparesis, white matter disease | NA | Chr10: 19271829-27617789 | 81147 | 33609 | 1466 | 89 | 2 | 1 | ***ACBD5 NM_145698.3 :*** *c.1205+1G>A, p.Gly402Aspfs5** |  | Absent in Saudi controls |
| LCA-F037 | 4 | LCA | NA | Chr17: 3,745,860-7,201,753 | 81010 | 34498 | 1502 | 98 | 2 | 1 | ***SPNS3***:NM_182538: c.G833C:p.Gly278Ala | Benign |  |
| LCA-F045 | 4 | LCA with myopathy | NA | chr4:91,514,884-103,679,117 | 79732 | 38998 | 1940 | 161 | 1 | 1 | ***DTHD1***:NM_001136536:c.T2C:p.Met1? |  | Absent in Saudi controls |
| NA | chr9:121,650,489-124,282,782 |
| NA | chr19:8,106,521-10,092,510 |
