# Supplementary material for: Autozygome-guided exome sequencing in retinal dystrophy patients reveals pathogenetic mutations and novel candidate disease genes
Source: HighWire-hosted journal article supplement (doi:10.1101/gr.144105.112), 2012-10-26
Supplement: Table_S4.docx [file Table_S4.docx]

Table S4: Number of genes sequenced in the autozygome-guided mutation analysis approach

| **ID** | **# Affected** | **Phenotype** | **# genes sequenced** |
| --- | --- | --- | --- |
| CR-F038 | 1 | CR | 5 |
| arRP-F09 | 2 | RP | 3 |
| arRP-F097 | 2 | RP | 4 |
| arRP-F058 | 2 | RP | 5 |
| arRP-F096 | 2 (2) | RP | 4 |
| arRP-F042 | 1 (2) | RP | 5 |
| CR-F017 | 2 | RD NOS | 3 |
| sRP-037 | 2 | RP | 3 |
| arRP-F076 | 4 | RP | 1 |
| arRP-F082 | 2 | RP | 2 |
| arRP-F033 | 1 (1) | RP | 3 |
| CR-F014 | 4 | CRD | 4 |
| arRP-F046 | 2 | RP | 6 |
| CR-F009 | 2 | CRD | 6 |
| CONE-F012 | 3 | CD | 6 |
| arRP-F099 | 1 (1) | RP | 5 |
| arRP-F027 | 5 | RP | 2 |
| CR-F015 | 2 | CRD | 2 |
| sRP-011 | 1 | RP | 5 |
| arRP-F016 | 1 | RP | 7 |
| arRP-F014 | 1 | RP | 6 |
| arRP-F022 | 1 | RP | 8 |
| arRP-F089 | 1 | RP | 7 |
| CR-F004 | 1 | CR | 9 |
| arRP-F051 | 1 | RP | 8 |
| arRP-F057 | 1 | RP | 8 |
| sRP-027 | 1 | RP | 5 |
| arRP-F070 | 1 | RP | 6 |
| sRP-F048 | 1 | RP | 8 |
| arRP-F100 | 1 | RP | 5 |
| sRP-055 | 1 | RP | 9 |
| sRP-053 | 1 | RP | 7 |
| CR-F032 | 1 | CD | 5 |
| CR-F001 | 1 | CD | 6 |
| sRP-F063 | 1 | RP | 6 |
| LCA-F042 | 1 | LCA | 5 |
| arRP-F122 | 1 | RP | 9 |
| arRP-F127 | 1 | RP | 7 |
| sRP-085 | 1 | RP | 5 |
| arRP-F012 | 1 | RP | 3 |
| arRP-F021 | 1 | RP | 5 |
| arRP-F032 | 1 | CRD | 8 |
| arRP-F036 | 1 | RP | 6 |
| arRP-F045 | 2 (1) | RP | 8 |
| SRP-024 | 1 | RP | 11 |
| arRP-F102 | 1 | RP | 6 |
