# Supplementary material for: Autozygome-guided exome sequencing in retinal dystrophy patients reveals pathogenetic mutations and novel candidate disease genes
Source: HighWire-hosted journal article supplement (doi:10.1101/gr.144105.112), 2012-10-26
Supplement: Table_S5.docx [file Table_S5.docx]

Table S5: Summary of autozygome-guided mutation analysis

| **ID** | **4 Largest ROH** | **Mutation revealed by direct sequencing** |
| --- | --- | --- |
| sRP-003 | Chr7:31200000-91600000 | NM_002900.2 RBP3 :c.1162C>T; p.(Arg388*) |
| Chr10:37500000-62760000 |
| Chr2: 1-20600000 |
| Chr3:1-15900000 |
| sRP-010 | Direct Sequence of TULP1 | NM_003322.3 *TULP1* :c.901C>T; p.(Gln301*) |
|
|
|
| sRP-013 | Chr3:126000000-171900000 | NM_152443.2 RDH12:c.178G>C; p.(Ala60Pro) |
| Chr7:4000000-47500000 |
| Chr6:128000000-162800000 |
| Chr14:55500000-77700000 |
| sRP-019 | Chr8:17300000-83000000 | NM_006269.1 *RP1*:c.3396G>A;p.(Trp1132*) |
| Chr17:68000000-78600000 |
| Chr9:86000000-98000000 |
| Chr15:69000000-72000000 |
| sRP-021 | Direct Sequence of TULP1 | NM_003322.3 *TULP1* :c.901C>T; p.(Gln301*) |
|
|
|
| sRP-034 | Chr1:38082455-51577319 | NM_014249.2 *NR2E3* :c.C951del, p.(Thr318Argfs*6) |
| Chr6:56285975-67227176 |
| Chr10:14614823-26668781 |
| Chr15:79600767-87510142 |
| sRP-035 | Chr6:40328715-46036213 | NM_000322.4 PRPH2 :c.136C>T; p.(Arg46*) |
| Chr8:12670788-28750163 |
| Chr8:28775203-54277885 |
| Chr8:54312587-71216461 |
| sRP-039 | Chr3: 65822068-115818066 | NM_000322.4 PRPH2 :c.1013A>G; p.(Asp338Gly) |
| Chr5:10131530-73481830 |
| Chr6: 16644612-67747930 |
| Chr9:38392030-73827660 |
| sRP-040 | Chr3:45587000-52442020 | [NM_014249.2 *NR2E3* :c.C951del; p.(Thr318Argfs*6)](https://mutalyzer.nl/checkForward?mutationName=NM_014249.2%28NR2E3_v001%29%3Ac.951del) |
| Chr6:67322174-71945156 |
| Chr11:39581078-44130628 |
| Chr15:69692553-88227283 |
| sRP-047 | Chr1:28082233-41559312 | NM_006269.1 *RP1*: c.606C>A, p.(Asp202Glu) |
| Chr9:26022776-32345674 |
| Chr8:49268546-56245942 |
| Chr15:45372257-50757914 |
| sRP-051 | Chr6:136550636-161989405 | NM_014249.2 *NR2E3*:c.C951del, p.(Thr318Argfs*6) |
| Chr7:10601213-50287805 |
| Chr15:69669905-71385913 |
| Chr17:35659021-57996370 |
| arRP-F035 | Chr14: 33748414-72939390 | NM_152443.2 RDH12 :c.139G>A; p.(Ala47Thr) |
| Chr6:31868392-36986052 |
| Chr6:69122120-72999186 |
| Chr20:57707915-62373979 |
| arRP-F049 | Chr4:1-3506800 | NM_001145291.1 *PDE6B*: c.810C>A, p.(Cys270*) |
| Chr6: 87596143-106040227 |
| Chr11:40581279-44120722 |
| Chr14: 33758324-69939488 |
| arRP-F094 | Chr14:19517641-22260568 | NM_020366.3 RPGRIP1 :c.3330T>A ; p.(Tyr1110*) |
| Chr7: 115456973-128458649 |
| Chr10: 9379838- 24675234 |
| Chr1:194278427-197468260 |
| CR-F008 | Chr17:54164382-58415381 | NM_017777.3 MKS1 :c.184A>G; p.(Thr62Ala) |
| ch11: 13191527-15776786 |
| Chr8:50478556-57255842 |
| Chr2: 227532464-230538161 |
| KCNV2-F2 | KCNV2 was sequenced directly according to the specific phenotype | NM_133497.3 KCNV2 :c.427G>T; p.(Glu143*) |
|
|
|
| KCNV2-F5 | KCNV2 was sequenced directly according to the specific phenotype | NM_133497.1 *KCNV2*: c.240 G>T; p.(Glu80Asp) |
|
|
|
| LCA-F009 | Chr14:19182561-20566134 | NM_020366.3 RPGRIP1:c.1107del; p.(Glu370Asnfs*5) |
| Chr15:42173255-48592502 |
| Chr17: 9685897-11518341 |
| Chr10:71304086-95500020 |
| sRP-014 | Chr15:69692553-88227283 | NM_201253.2 *CRB1:* c.2024G>A, ):p.(Trp675*) |
| Chr6:67322174-71945156 |
| Chr3:45587000-52442020 |
| Chr1:195502450-198274579 |
| arRP-F098 | ch11: 12181627-16756886 | NM_001142800.1 *EYS:* c.6050G>T, p.(Gly2017Val) |
| Chr6:63438615-69023309 |
| Chr14:64568624-81194469 |
| Chr2: 237522567-231568068 |
| sRP-088 | Chr14: 20212635-23996772 | NM_020366.3 *RPGRIP1*: c.3565C>T, p.(Arg1189*) |
| Chr14:19072552-23574126 |
| Chr1:172514044-178245766 |
| Chr6:62342182-70844136 |
| sRP-002 | Chr2:98524843-99483972 | NM_001298.2 CNGA3:c.488C>T; p.(Pro163Leu) |
| Chr7: 114486573-125458447 |
| Chr8:51248147-55751721 |
| Chr9:26020375-32075694 |
| sRP-005 | Chr6: 47839646-89096817 | NM_001297.1 *CNGB1*:c.2957A>T; p.(Lys986Met) |
| Chr16:55713463-60207800 |
| Chr4: 22451781-25479286 |
| Chr7: 115456973-128458649 |
| sRP-007 | Chr6:63438615-69023309 | NM_001142800.1 *EYS*:c.6050G>T; p.(Gly2017Val) |
| Chr4: 100243009-104384356 |
| Chr16:55883473-61007451 |
| Chr1:197602350-199375889 |
| sRP-015 | Chr15:88162635-91355384 | NM_000326.4 *RLBP1*:c.452G>A; p.(Arg151Gln) |
| Chr14: 40490416-65282438 |
| Chr6:46835653-85086715 |
| Chr7:60354273-63995781 |
| sRP-018 | Chr15:66188405-87008233 | NM_000350.2 *ABCA4* :c.4316G>A; p.(Gly1439Asp) |
| Chr1:90773299-98324598 |
| Chr13: 79238114-85223782 |
| Chr14: 21587088- 33263359 |
|  |  |  |
| Red highlights the region which harbors the disease causing mutation | | |
| * | shared homozygous region between all affected individual in the family | |
|  |  |  |
