# Supplementary material for: Autozygome-guided exome sequencing in retinal dystrophy patients reveals pathogenetic mutations and novel candidate disease genes
Source: HighWire-hosted journal article supplement (doi:10.1101/gr.144105.112), 2012-10-26
Supplement: Table_S6.docx [file Table_S6.docx]

Table S6: table shows the average reads in ROH region for all NGS negative cases

| **Family ID** | **# affected** | **Phenotype** | **# genes sequenced** | **ROH** | **Average number of reads** |
| --- | --- | --- | --- | --- | --- |
|
| sRP-001 | 1(1) | non-syndromic RP | 5 | Chr1: 1-109,850,000 | 40 |
| Chr3: 1-52,900,000 | 71 |
| Chr17: 12,900,000-68,600,000 | 80 |
| Chr6: 2,500,000-87,000,000 | 79 |
| sRP-022 | 1(1) | non-syndromic RP | 3 | Chr2:79,000,000-152,000,000 | 88 |
| Chr3: 69,000,000-100,000,000 | 110 |
| Chr4: 5,000,000-25,000,000 | 465 |
| sRP-004 | 1(1) | non-syndromic RP | 2 | Chr7: 134,000,000-139,000,000 | 81 |
| Chr10: 15,000,000-17,500,000 | 66 |
| Chr15: 41,000,000-43,000,000 | 65 |
| sRP-017 | 1(1) | non-syndromic RP | 4 | Chr5: 48,000,000-67,000,000 | 91 |
| Chr2: 63,000,000-75,000,000 | 88 |
| Chr6: 148,500,000-160,000,000 | 82 |
| Chr17: 54,500,000-63,000,000 | 78 |
| arRP-F017 | 3 | non-syndromic RP | 7 | Chr6:1-90,000,000 | 79 |
| Chr11:27,012,359-80,054,831 | 80 |
| Chr14:84,500,000-93,268,050 | 76 |
| arRP-F112 | 6 (3) | RP, alopecia, hearing loss | NA | chr1:94,270,165-97,918,306 | 128 |
| NA | chr4:3,579,139-4,907,387 | 226 |
| CR-F24 | 1 | Cone-rod dystrophy | NA | No significant ROH | NA |
| CRSPW | 3 | CRD, spastic paraparesis, white matter disease | NA | Chr10: 19,271,829-27,617,789 | 111 |
| LCA-F037 | 4 | LCA | NA | Chr17: 3,745,860-7,201,753 | 72 |
| LCA-F045 | 4 | LCA with myopathy | NA | chr4:91,514,884-103,679,117 | 99 |
| sRP-006 | 1(1) | non-syndromic RP | 4 | Chr8:83,000,000-96,000,000 | 143 |
| Chr20: 5,000,000-17,000,000 | 134 |
| Chr10: 2,500,000-6,000,000 | 100 |
| Chr18: 1-2,900,000 | 121 |
| arRP-F048 | 5 | non-syndromic RP | 2 | chr3: 83,157,375-107,875,119 | 126 |
| arRP-F065 | 3 | non-syndromic RP | NA | Chr2: 60,354,273-63,995,781 | 51 |
| Chr15: 47,373,159-50,179,902 | 66 |
| arRP-F074 | 4 | non-syndromic RP | 3 | Chr8: 75,000,000-110,000,000 | 91 |
| arRP-F077 | 3 | non-syndromic RP | NA | chr7:105,000,000-147,000,000 | 113 |
| CR-F033 | 1 | cone-rod dystrophy | NA | No significant ROH | NA |
| CR-F035 | 2 | Cone-rod dystrophy | NA | No significant ROH | NA |
